# Supplementary figures and images for: The improvement of corrosion resistance, biocompatibility and osteogenesis of the novel porous Mg–Nd–Zn alloy
Source: Royal Society of Chemistry journal article supplement (doi:10.1039/c7tb00920h), 2017-01-01

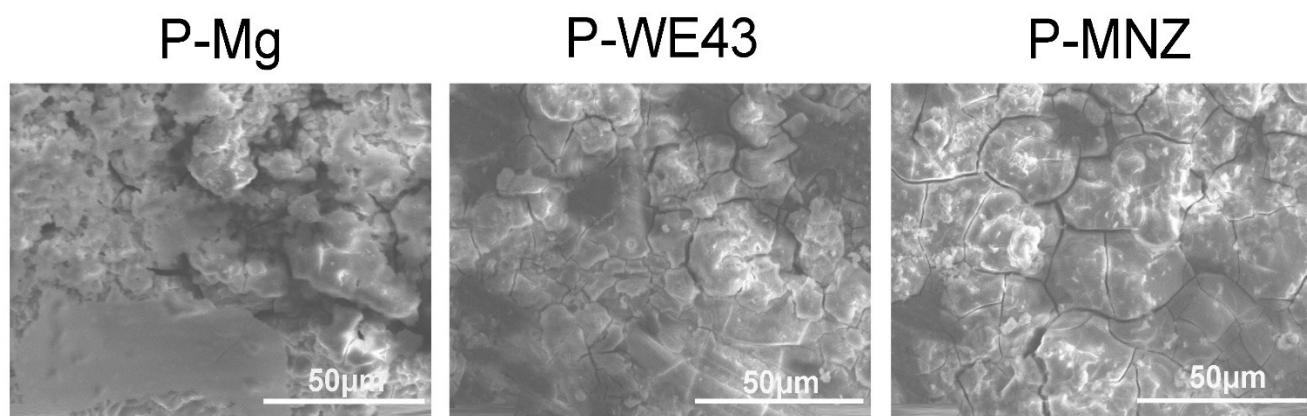

**Figure S1.** The surface morphology of materials immersed in DMEM for 72h.

Supplement: c7tb00920h1.pdf [file c7tb00920h1.pdf]
